# Supplementary material for: Improving parent satisfaction: an intervention to increase neonatal parent–provider communication
Source: PubMed Central journal article supplement — J Perinatol. 2009 Oct 22;30(6):425–30. doi: 10.1038/jp.2009.163 (PMC2878401; doi:10.1038/jp.2009.163), 2009-10-22
Supplement: jp2009163x1.pdf [file jp2009163x1.pdf]

**NICU SURVEY about Communication between Parents and Doctors**

Date: \_\_\_ / \_\_\_ / \_\_\_  
 ○ Mom ○ Dad ○ other:

1. Did you talk with a doctor from the NICU **before** your baby was born?   ○ Yes   ○ No   ○ I don't know
2. When was the **first time** a NICU doctor talked with to you about your baby? \_\_\_\_\_
3. Since your baby came to the NICU, how often has your baby's doctor talked with you? \_\_\_\_\_
4. How many times **in the past 7 days** have you:    \_\_\_ Talked with the doctor at the bedside  
                                                                   \_\_\_ Talked with the doctor on the phone  
                                                                   \_\_\_ Had a family conference  
                                                                   \_\_\_ Other: \_\_\_\_\_
5. When was the **last time** your baby's doctor talked to you? \_\_\_\_\_
6. When is the **next time** your baby's doctor will talk with you? \_\_\_\_\_

Families working with NNPs were asked about their experience with both doctors and NNPs

Open ended questions assessing the amount of time providers spent with parents.

- |  |       |           |         |        |     |
|--|-------|-----------|---------|--------|-----|
|  | never | sometimes | usually | always | n/a |
|  | n     | s         | u       | a      |     |
7. Are your baby's doctors available when you want to talk with them? ..... ○ ..... ○ ..... ○ ..... ○ ..... ○
  8. How often do you understand what your baby's doctors are saying when they talk with you about your baby? ..... ○ ..... ○ ..... ○ ..... ○ ..... ○
  9. When you talk with your baby's doctors, how often are you able to ask questions about things that worry you about your baby?..... ○ ..... ○ ..... ○ ..... ○ ..... ○
  10. Do your baby's doctors understand your concerns about your baby? .. ○ ..... ○ ..... ○ ..... ○ ..... ○
  11. Do your baby's doctors talk with you enough? ..... ○ ..... ○ ..... ○ ..... ○ ..... ○
  12. How often would you like to talk with your baby's doctors? \_\_\_\_\_
  13. Who is the doctor who has given you the most information about your baby in the last 3 to 5 days?  
     \_\_\_\_\_ ○ I don't know
  14. Overall, how satisfied or dissatisfied are you with communication with your baby's doctors (choose one):  

|                          |                              |               |                           |                       |
|--------------------------|------------------------------|---------------|---------------------------|-----------------------|
| <b>Very Dissatisfied</b> | <b>Somewhat Dissatisfied</b> | <b>Unsure</b> | <b>Somewhat Satisfied</b> | <b>Very Satisfied</b> |
| ○                        | ○                            | ○             | ○                         | ○                     |
- Main Language you read and speak: \_\_\_\_\_ Other Languages: \_\_\_\_\_
- School Completed:
- |                                                                                       |                                                                                      |
|---------------------------------------------------------------------------------------|--------------------------------------------------------------------------------------|
| ___ None<br>___ Some Grade School<br>___ Some High School<br>___ Finished High School | ___ Some College<br>___ Completed College<br>___ Advanced Degree<br>___ Other: _____ |
|---------------------------------------------------------------------------------------|--------------------------------------------------------------------------------------|
- Parents' Occupations: \_\_\_\_\_ (mother) \_\_\_\_\_ (father)

Assessment of Communication Constructs:

- Availability
- Understanding
- Reciprocity
- Empathy
- Quantity

Overall Satisfaction Assessment

The survey was available in English and Spanish. Interpreters were used as needed.

Comments: How can we improve communication between you and your baby's doctors?

\_\_\_\_\_

\_\_\_\_\_

\_\_\_\_\_

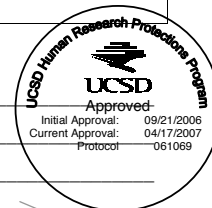

Space for more comments on the back.  
 (C) Picker Institute and Press Ganey Surveys, modified

Parents were encouraged to express any comments about communication or the survey, and to write on the back if needed.
