# Supplementary material for: Improving parent satisfaction: an intervention to increase neonatal parent–provider communication
Source: PubMed Central journal article supplement — J Perinatol. 2009 Oct 22;30(6):425–30. doi: 10.1038/jp.2009.163 (PMC2878401; doi:10.1038/jp.2009.163), 2009-10-22
Supplement: jp2009163x3.pdf [file jp2009163x3.pdf]

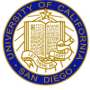

UNIVERSITY of CALIFORNIA, SAN DIEGO  
MEDICAL CENTER

Welcome to the UCSD Infant Special Care Center!

Your baby's Primary Medical Provider is:

**Doctors**

**Attending Neonatologist-- The Supervising Doctors**

(1 week) Dr. Blake Dr. Burns Dr. Freedman Dr. Hunnicutt  
Dr. McIntyre (Dr. Pierce) Dr. Potter Dr. Winchester

**Fellow-- Doctors who are Neonatologists in Training**

(3 weeks) Dr. Akone Dr. Bashir Dr. Boyce Dr. Crusher  
Dr. McCoy Dr. Piper Dr. Pulaski (Dr. Selar) Dr. Spock

**Resident-- Doctors who are Pediatricians in Training**

(4 weeks) Dr. Baltar Dr. Burns Dr. Cottle Dr. Curnow Dr. Floyd  
Dr. Forrester Dr. Goodfellow Dr. Hibbert (Dr. Jones)  
Dr. Marcus Dr. Maturin Dr. Salik Dr. Soran  
Dr. Theopolis Dr. Welby Dr. Who Dr. Xavier Dr. Yueh

**Neonatal Nurse Practitioners:**

Christine Chapel Carol Hathaway Margaret Houlihan

Call (619) 543-6560 to talk to them.

¡Tenemos intérpretes españoles!

2008-2009
